# Supplementary material for: p-Aminophenylalanine Involved in the Biosynthesis of Antitumor Dnacin B1 for Quinone Moiety Formation
Source: PubMed Central journal article supplement (PMC7570522; doi:10.3390/molecules25184186), 2020-09-12
Supplement: molecules-25-04186-s001.pdf [file molecules-25-04186-s001.pdf]

## *p*-Amino-phenylalanine Involved in the Biosynthesis of Antitumor Dnacin B1 for Quinone Moiety Formation

Xiaojing Hu<sup>1</sup>, Xing Li<sup>1</sup>, Yong Sheng<sup>1</sup>, Hengyu Wang<sup>1</sup>, Xiaobin Li<sup>1,2</sup>, Dongjin Leng<sup>1</sup>, Yixin Ou<sup>1</sup>, Zixin Deng<sup>1</sup>, Linqun Bai<sup>1</sup> and Qianjin Kang<sup>1\*</sup>

<sup>1</sup>State Key Laboratory of Microbial Metabolism, Joint International Research Laboratory of Metabolic & Developmental Sciences, and School of Life Sciences & Biotechnology, Shanghai Jiao Tong University, Shanghai 200240, China.

<sup>2</sup>Zhuhai Precision Medical Center, Zhuhai People's Hospital, Zhuhai Hospital Affiliated with Jinan University, Zhuhai, Guangdong 519000, China.

**\* Correspondence:**

\*Dr. Qianjin Kang: [qjkang@sjtu.edu.cn](mailto:qjkang@sjtu.edu.cn); Tel/Fax: +86 21 34206119

## Supplementary Tables

Table S1. Strains and plasmids used in this study

| Strains and plasmids                          | Description                                                             | Source or reference |
|-----------------------------------------------|-------------------------------------------------------------------------|---------------------|
| <i>Actinosynnema pretiosum</i>                |                                                                         |                     |
| <i>A. pretiosum</i><br>DSM 44131 <sup>T</sup> | Wild-type producer for dnacin B1                                        | This work           |
| HXJA01                                        | Mutant of <i>din</i> -disruption                                        | This work           |
| <i>Escherichia coli</i>                       |                                                                         |                     |
| <i>E. coli</i> DH10B                          | Plasmid amplification strain                                            | Invitrogen          |
| <i>E. coli</i> ET12567/<br>pUZ8002            | Conjugation donor strain                                                | (Paget et al. 1999) |
| <i>E. coli</i> BL21(DE3)                      | Protein expression strain                                               | Invitrogen          |
| HXJE03                                        | BL21(DE3) with plasmids pJQK350<br>and pJQK351                          | This work           |
| HXJE04                                        | BL21(DE3) with plasmids<br>pCDFDuet and pETDuet                         | This work           |
| Plasmids                                      |                                                                         |                     |
| pBluescript SK (+)                            | <i>ColE</i> , <i>lacZ</i> , <i>bla</i> , <i>oriF1</i>                   | Stratagene          |
| pJTU1278                                      | <i>rep pIJ101</i> , <i>lacZ</i> , <i>tsr</i> , <i>bla</i> , <i>oriT</i> | (He et al. 2010)    |
| pJQK301                                       | Construct for <i>din</i> -disruption                                    | This work           |
| pJQK302                                       | pJQK301 with cloned <i>aac(3)IV</i>                                     | This work           |

|          |                                                             |           |
|----------|-------------------------------------------------------------|-----------|
| pET28a   | <i>rep pBR322, P<sub>T7</sub>, His<sub>6</sub>-tag, kan</i> | Novagen   |
| pCDFDuet | <i>rep CDF, P<sub>T7</sub>, aadA</i>                        | Novagen   |
| pETDuet  | <i>rep pBR322, P<sub>T7</sub>, bla</i>                      | Novagen   |
| pJQK354  | pCDFDuet with <i>dinV</i> gene                              | This work |
| pJQK355  | pETDuet with <i>dinE</i> and <i>dinF</i> gene               | This work |
| pJQK356  | pET28a with <i>apat1</i> gene                               | This work |
| pJQK357  | pET28a with <i>apat2</i> gene                               | This work |
| pJQK358  | pET28a with <i>apat3</i> gene                               | This work |
| pJQK359  | pET28a with <i>apat4</i> gene                               | This work |
| pJQK360  | pET28a with <i>apat5</i> gene                               | This work |
| pJQK361  | pET28a with <i>apat6</i> gene                               | This work |
| pJQK362  | pET28a with <i>apat7</i> gene                               | This work |
| pJQK363  | pET28a with <i>apat8</i> gene                               | This work |
| pJQK364  | pET28a with <i>apat9</i> gene                               | This work |
| pJQK365  | pET28a with <i>tyrB</i> gene                                | This work |

---

**Table S2.** Primers used in this study

| Primers                                               | Sequences (5'→3')                      |
|-------------------------------------------------------|----------------------------------------|
| Primers used for the construction of knockout mutants |                                        |
| din-del-L/F ( <i>EcoRI</i> )                          | <u>AGAATTC</u> AGCGGTTGTGGGTGCTGTGC    |
| din-del-L/R ( <i>HindIII</i> )                        | AA <u>AGCTT</u> GGTGGTCTGGCGGTGTTCGA   |
| din-del-R/F ( <i>HindIII</i> )                        | AA <u>AGCTT</u> GTGGTTCCTGTGCCAGTTGGAG |
| din-del-R/R ( <i>KpnI</i> )                           | AG <u>TACCG</u> GTGTCGATCCCCGTTCC      |
| din-val/F                                             | GGTGCTGCGCGAGGTGGA                     |
| din-val/R                                             | CCCGGACACGTCGACCAC                     |
| din-in/F                                              | ACGACACGTCTGATTCGGAG                   |
| din-in/R                                              | CACAGCTCACCCAGGAACAC                   |
| Primers used for qPCR                                 |                                        |
| dinI-RT/F                                             | CTCATCCGCCCCGACA                       |
| dinI-RT/R                                             | GCCCGAACAGGACCGC                       |
| dinP-RT/F                                             | TCAAGCAGTCAGCCACAGG                    |
| dinP-RT/R                                             | CAGCGACAGCGAACCG                       |
| dinQ-RT/F                                             | CGCTTCACCGTTTCGC                       |
| dinQ-RT/R                                             | GAGCACCTTCGGGTTGTCG                    |
| dinX-RT/F                                             | CGACCACGAGAAGATGCG                     |

|           |                      |
|-----------|----------------------|
| dinX-RT/R | GAACCGGGACAGCCACA    |
| dinY-RT/F | GTCTACCTGGTGCAGGGCA  |
| dinY-RT/R | GGTGAAGCGGGTCTCGTC   |
| hrdB-RT/F | GCGGTCGAGAAGTTCGACTA |
| hrdB-RT/R | CCGGGATGCGGATGGTG    |

---

Primers used for gene cloning and protein expression of functional genes

---

|                           |                                     |
|---------------------------|-------------------------------------|
| dinV/F ( <i>Bam</i> HI)   | <u>AGGATCC</u> ATGCGGACGCTGCTCATCGA |
| dinV/R ( <i>Hind</i> III) | AAAGCTTTCATGGGATCCTCCGGGGT          |
| dinE/F ( <i>Bam</i> HI)   | <u>AGGATCCT</u> TGTCGGTGGCTG        |
| dinE/R ( <i>Hind</i> III) | AAAGCTTAATTACTCTCTGG                |
| dinF/F ( <i>Nde</i> I)    | AACATATGGTGCCCCTTGAGC               |
| dinF/R ( <i>Xho</i> I)    | <u>AACTCGAGG</u> CTCTTCGGGGTC       |
| APAT1/F ( <i>Nde</i> I)   | <u>ACATATGGT</u> GCGGGTACCAGCGCT    |
| APAT1/R ( <i>Eco</i> RI)  | <u>GAATTC</u> CCTACCCGCCAGCTTCCTG   |
| APAT2/F ( <i>Nde</i> I)   | <u>ACATATGAT</u> GCAGCACTCGATCC     |
| APAT2/R ( <i>Eco</i> RI)  | <u>GAATTCT</u> CAAGCCACCGGCACCTC    |
| APAT3/F ( <i>Nde</i> I)   | <u>ACATATGAT</u> GCTCGGTGTCTCCAC    |
| APAT3/R ( <i>Eco</i> RI)  | <u>GAATTCT</u> CAACGCGCGGGCGGGGC    |
| APAT4/F ( <i>Nde</i> I)   | <u>ACATATGAT</u> GACCGCACCCGGACAG   |

|                          |                                    |
|--------------------------|------------------------------------|
| APAT4/R ( <i>EcoRI</i> ) | <u>GAATTCTCATGCGGTGTCGGGCGAGG</u>  |
| APAT5/F ( <i>NdeI</i> )  | <u>ACATATGATGGCTGAGCCTGAGAC</u>    |
| APAT5/R ( <i>EcoRI</i> ) | <u>GAATTCCTACTTCACCTCGGCGAGC</u>   |
| APAT6/F ( <i>NdeI</i> )  | <u>ACATATGGTGGCCCGGATCGTCCAT</u>   |
| APAT6/R ( <i>EcoRI</i> ) | <u>GAATTCCTACCCGTTGGCGGTGAAGG</u>  |
| APAT7/F ( <i>NdeI</i> )  | <u>ACATATGATGAGCCCCGCGCTGGAC</u>   |
| APAT7/R ( <i>EcoRI</i> ) | <u>GAATTCTCACCGGCTGACCTCCTTGCT</u> |
| APAT8/F ( <i>NdeI</i> )  | <u>ACATATGATGAGCGTGCGCACCCG</u>    |
| APAT8R ( <i>EcoRI</i> )  | <u>GAATTCTCAGCGCTCGAACGACCG</u>    |
| APAT9/F ( <i>NdeI</i> )  | <u>ACATATGGTGCCTCCCTTTCCGTG</u>    |
| APAT9/R ( <i>EcoRI</i> ) | <u>GAATTCTCACAGCACCTCCCCCAA</u>    |
| tyrB/F ( <i>NdeI</i> )   | <u>AACATATGGTGTTTCAAAAAGTTG</u>    |
| tyrB/R ( <i>EcoRI</i> )  | <u>AAGAATTCCATCACCGCAGC</u>        |

---

**Table S3.** General genomic features of *Actinosynnema pretiosum* subsp. *auranticum* DSM 44131<sup>T</sup>

| Features                           | Chromosome        |
|------------------------------------|-------------------|
| Genome topology                    | Circular          |
| Assembly size (bp)                 | 8,105,537         |
| G + C content (%)                  | 73.95             |
| Protein coding genes               | 6663              |
| tRNA genes                         | 57                |
| rRNA genes                         | 7                 |
| Secondary metabolite gene clusters | 28                |
| NCBI BioProject                    | PRJNA541432       |
| GenBank accession                  | JABBHD000000000.1 |

**Table S4.** AntiSMASH analysis of secondary metabolite BGCs of strains DSM 44131<sup>T</sup>, X47, DSM 43827<sup>T</sup> and ATCC 31280 genome sequences.

| Type            | DSM 44131 <sup>T</sup> | X47 | DSM 43827 <sup>T</sup> | ATCC 31280 |
|-----------------|------------------------|-----|------------------------|------------|
| Terpene         | 4                      | 4   | 4                      | 4          |
| Bacteriocin     | 1                      | 1   | 1                      | 1          |
| Lanthipeptide   | 1                      | 2   | 1                      | 2          |
| Indole          | 1                      | 1   | 1                      | 1          |
| Type I PKS      | 8                      | 8   | 8                      | 8          |
| NRPS            | 7                      | 5   | 4                      | 5          |
| PKS-NRPS        | 2                      | 2   | 3                      | 1          |
| Nucleoside      | 1                      | 1   | 1                      | 1          |
| Lasso peptide   | 1                      | 1   | 2                      | 1          |
| Thiopeptide     | 1                      | 1   | 1                      | 1          |
| Oligosaccharide | 1                      | 1   | 0                      | 0          |
| Total           | 28                     | 27  | 26                     | 25         |



**Table S5.** Similarity analysis of the predictable BGCs among strains DSM 44131<sup>T</sup>, X47, DSM 43827<sup>T</sup> and ATCC 31280 genomes with known clusters.

| Cluster | Type         | Most similar known cluster<br>(compound / strain)  | DSM<br>44131 <sup>T</sup> | X47  | DSM<br>43827 <sup>T</sup> | ATCC<br>31280 |
|---------|--------------|----------------------------------------------------|---------------------------|------|---------------------------|---------------|
| 1       | Terpene      | Geosmin                                            | +                         | +    | +                         | +             |
|         |              | <i>Streptomyces coelicolor</i><br>A3(2)            | 100%                      | 100% | 100%                      | 100%          |
| 2       | Indole       | Frankiamicin                                       | +                         | +    | +                         | +             |
|         |              | <i>Frankia</i> sp. EAN1pec                         | 14%                       | 14%  | 14%                       | 14%           |
| 3       | T1PKS        | Amycolamycin                                       | +                         | +    | +                         | +             |
|         |              | <i>Amycolatopsis</i> sp. strain<br>Hca4            | 2%                        | 2%   | 2%                        | 2%            |
| 4       | T1PKS        | Salinilactam                                       | +                         | +    | +                         | +             |
|         |              | <i>Salinispora tropica</i> CNB-<br>440             | 88%                       | 88%  | 84%                       | 84%           |
| 5       | Nucleoside   | Tunicamycin                                        | +                         | +    | +                         | +             |
|         |              | <i>Streptomyces chartreusis</i><br>strain NRRL3882 | 64%                       | 64%  | 64%                       | 64%           |
| 6       | NRPS-<br>PKS | Nocamycin                                          | +                         | +    | -                         | -             |
|         |              | <i>Saccharothrix syringae</i><br>NRRL B-16468      | 66%                       | 66%  | -                         | -             |
| 7       | PKS          | Paulomycin                                         | +                         | +    | -                         | -             |
|         |              | <i>Streptomyces</i> sp. YN86                       | 32%                       | 32%  | -                         | -             |

|    |              |                                                                           |     |     |     |     |
|----|--------------|---------------------------------------------------------------------------|-----|-----|-----|-----|
| 8  | T1PKS        | Ansamitocin<br><i>Actinosynnema pretiosum</i><br>ATCC 31280               | +   | +   | +   | +   |
|    |              |                                                                           | 97% | 97% | 92% | 95% |
| 9  | Lassopeptide | Cattlecin<br><i>Streptomyces cattleya</i><br>NRRL 8057                    | +   | +   | +   | -   |
|    |              |                                                                           | 50% | 50% | 50% |     |
| 10 | NRPS         | Himastatin<br><i>Streptomyces himastatinicus</i> ATCC<br>53653            | +   | +   | -   | -   |
|    |              |                                                                           | 8%  | 8%  |     |     |
| 11 | NRPS         | Naphthyridinomycin<br><i>Streptomyces lusitanus</i>                       | +   | +   | -   | -   |
|    |              |                                                                           | 64% | 64% |     |     |
| 12 | Terpene      | Isorenieratene<br><i>Streptomyces griseus</i><br>NBRC 13350               | +   | +   | +   | +   |
|    |              |                                                                           | 85% | 85% | 85% | 85% |
| 13 | T1PKS        | Coelimycin<br><i>Streptomyces coelicolor</i><br>A3(2)                     | +   | +   | -   | -   |
|    |              |                                                                           | 8%  | 8%  |     |     |
| 14 | T1PKS        | Kedarcidin<br><i>Streptoalloteichus</i> sp.<br>ATCC 53650                 | +   | +   | +   | +   |
|    |              |                                                                           | 6%  | 6%  | 6%  | 6%  |
| 15 | T1PKS        | 9-methylstreptimidone<br><i>Streptomyces himastatinicus</i> ATCC<br>53653 | +   | +   | -   | -   |
|    |              |                                                                           | 6%  | 6%  |     |     |

|    |               |                                                         |     |     |      |      |
|----|---------------|---------------------------------------------------------|-----|-----|------|------|
| 16 | Terpene       | Phenalinolactone                                        | +   | +   | -    | -    |
|    |               | <i>Streptomyces</i> sp. Tu6071                          | 8%  | 8%  |      |      |
| 17 | NRPS          | Marformycins                                            | +   | +   | -    | -    |
|    |               | <i>Streptomyces drozdowiczii</i> strain SCSIO 10141     | 20% | 20% |      |      |
| 18 | T1PKS         | Rifamycin                                               | +   | +   | -    | -    |
|    |               | <i>Amycolatopsis mediterranei</i>                       | 7%  | 7%  |      |      |
| 19 | NRPS-PKS      | Microtermolide                                          | +   | +   | +    | -    |
|    |               | <i>Streptomyces</i> sp. MspMP-M5 B073DRAFT              | 33% | 33% | 26%  |      |
| 20 | NRPS          | Salinichelins                                           | +   | +   | +    | +    |
|    |               | <i>Salinispora pacifica</i> CNY331                      | 53% | 53% | 53%  | 53%  |
| 21 | Terpene       | SF2575                                                  | +   | +   | +    | +    |
|    |               | <i>Streptomyces</i> sp. SF2575                          | 6%  | 6%  | 6%   | 6%   |
| 22 | Lanthipeptide | Tetronasin                                              | +   | +   | +    | +    |
|    |               | <i>Streptomyces longisporoflavus</i> strain NCIMB 11426 | 9%  | 9%  | 9%   | 9%   |
| 23 | T1PKS         | Macbecin                                                | -   | -   | +    | +    |
|    |               | <i>Actinosynnema pretiosum</i> ATCC 31280               |     |     | 100% | 100% |
| 24 | NRPS          | Arylomycin                                              | -   | -   | +    | -    |

|    |              |                                                                            |   |   |           |           |
|----|--------------|----------------------------------------------------------------------------|---|---|-----------|-----------|
|    |              | <i>Streptomyces filamentosus</i><br>NRRL 11379                             |   |   | 22%       |           |
| 25 | NRPS         | Tallysomycin<br><i>Streptoalloteichus hindustanus</i> strain ATCC 31158    | - | - | +<br>50%  | -         |
| 26 | NRPS         | Rimosamide<br><i>Streptomyces rimosus</i> subsp. <i>rimosus</i> ATCC 10970 | - | - | +<br>21%  | +<br>21%  |
| 27 | Terpene      | Brasilicardin A<br><i>Nocardia brasiliensis</i>                            | - | - | +<br>45%  | +<br>45%  |
| 28 | T1PKS        | Cyclizidine<br><i>Streptomyces</i> sp. NCIB 11649                          | - | - | +<br>76%  | -         |
| 29 | NRPS         | Nocardicin A<br><i>Nocardia uniformis</i> subsp. <i>tsuyamanensis</i>      | - | - | +<br>100% | +<br>100% |
| 30 | NRPS-<br>PKS | Svaricin<br><i>Streptomyces variabilis</i>                                 | - | - | +<br>12%  | +<br>12%  |

**Table S6.** The sequence analysis of nine APAT genes in strain DSM 44131<sup>T</sup>

| Gene         | ORF (bp) | Location                       |                         |                         |                         | Similarity with TyrB |
|--------------|----------|--------------------------------|-------------------------|-------------------------|-------------------------|----------------------|
|              |          | DSM 44131 <sup>T</sup>         | X47                     | DSM 43827 <sup>T</sup>  | ATCC 31280              | Protein%             |
| <i>apat1</i> | 1173     | Contig 6<br>(130,523-131,695)  | 7,778,946-<br>7,780,118 | 7,909,287-<br>7,910,459 | 7,999,330-<br>8,000,502 | 30.5                 |
| <i>apat2</i> | 1464     | Contig 6<br>(147,276-145,813)  | 7,795,699-<br>7,794,236 | 7,927,324-<br>7,925,861 | 8,017,395-<br>8,015,932 | 29.5                 |
| <i>apat3</i> | 1167     | Contig 6<br>(267,147-268,313)  | 7,916,736-<br>7,915,570 | 8,031,576-<br>8,030,410 | 8,122,829-<br>8,121,663 | 34.4                 |
| <i>apat4</i> | 1317     | Contig 6<br>(474,018-475,334)  | 8,122,441-<br>8,123,757 | 8,238,936-<br>8,240,252 | 8,331,054-<br>8,332,370 | 30.1                 |
| <i>apat5</i> | 1242     | Contig 10<br>(353,427-354,668) | 7,626,785-<br>7,628,026 | 7,777,575-<br>7,778,816 | 7,867,491-<br>7,868,732 | 31.1                 |
| <i>apat6</i> | 1002     | Contig 1<br>(885,098-886,099)  | 5,191,382-<br>5,190,381 | 5,185,381-<br>5,184,380 | 5,287,898-<br>5,286,897 | 34.7                 |
| <i>apat7</i> | 1146     | Contig 3<br>(214,993-216,138)  | 6,602,979-<br>6,601,834 | 6,746,083-<br>6,744,932 | 6,836,045-<br>6,834,894 | 35.1                 |
| <i>apat8</i> | 1068     | Contig 6<br>(638,667-639,734)  | 156,585-<br>155,518     | 159,114-<br>158,047     | 160,290-<br>159,223     | 33.8                 |
| <i>apat9</i> | 1134     | Contig 3 (53,174-<br>52,041)   | 6,440,015-<br>6,438,882 | 6,524,023-<br>6,522,890 | 6,680,124-<br>6,678,991 | 34.8                 |

## Supplementary Figures

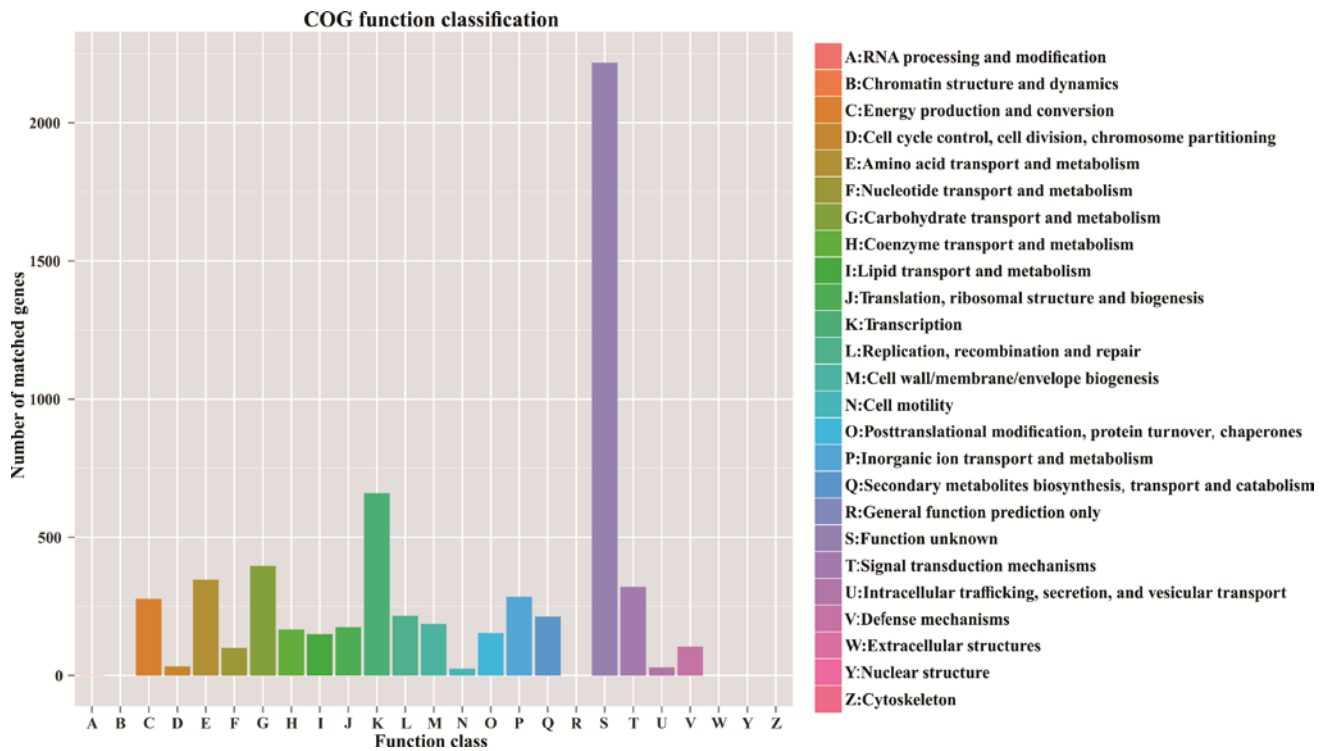

**Figure S1.** COG function classification of the annotated genes in the genome of strain DSM 44131<sup>T</sup>. 6054 annotated ORFs are distributed into 25 COG functional categories. The horizontal axis and vertical axis represent COG functional categories and the matched gene numbers, respectively.

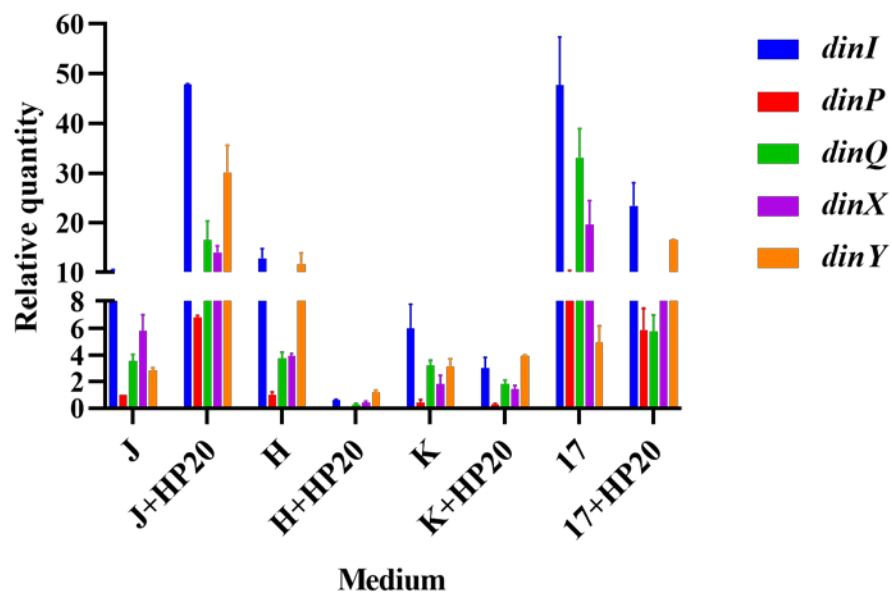

**Figure S2.** Transcriptional analysis of functional genes within dnacin B1 BGC in strain DSM 44131<sup>T</sup> with different fermentation media.

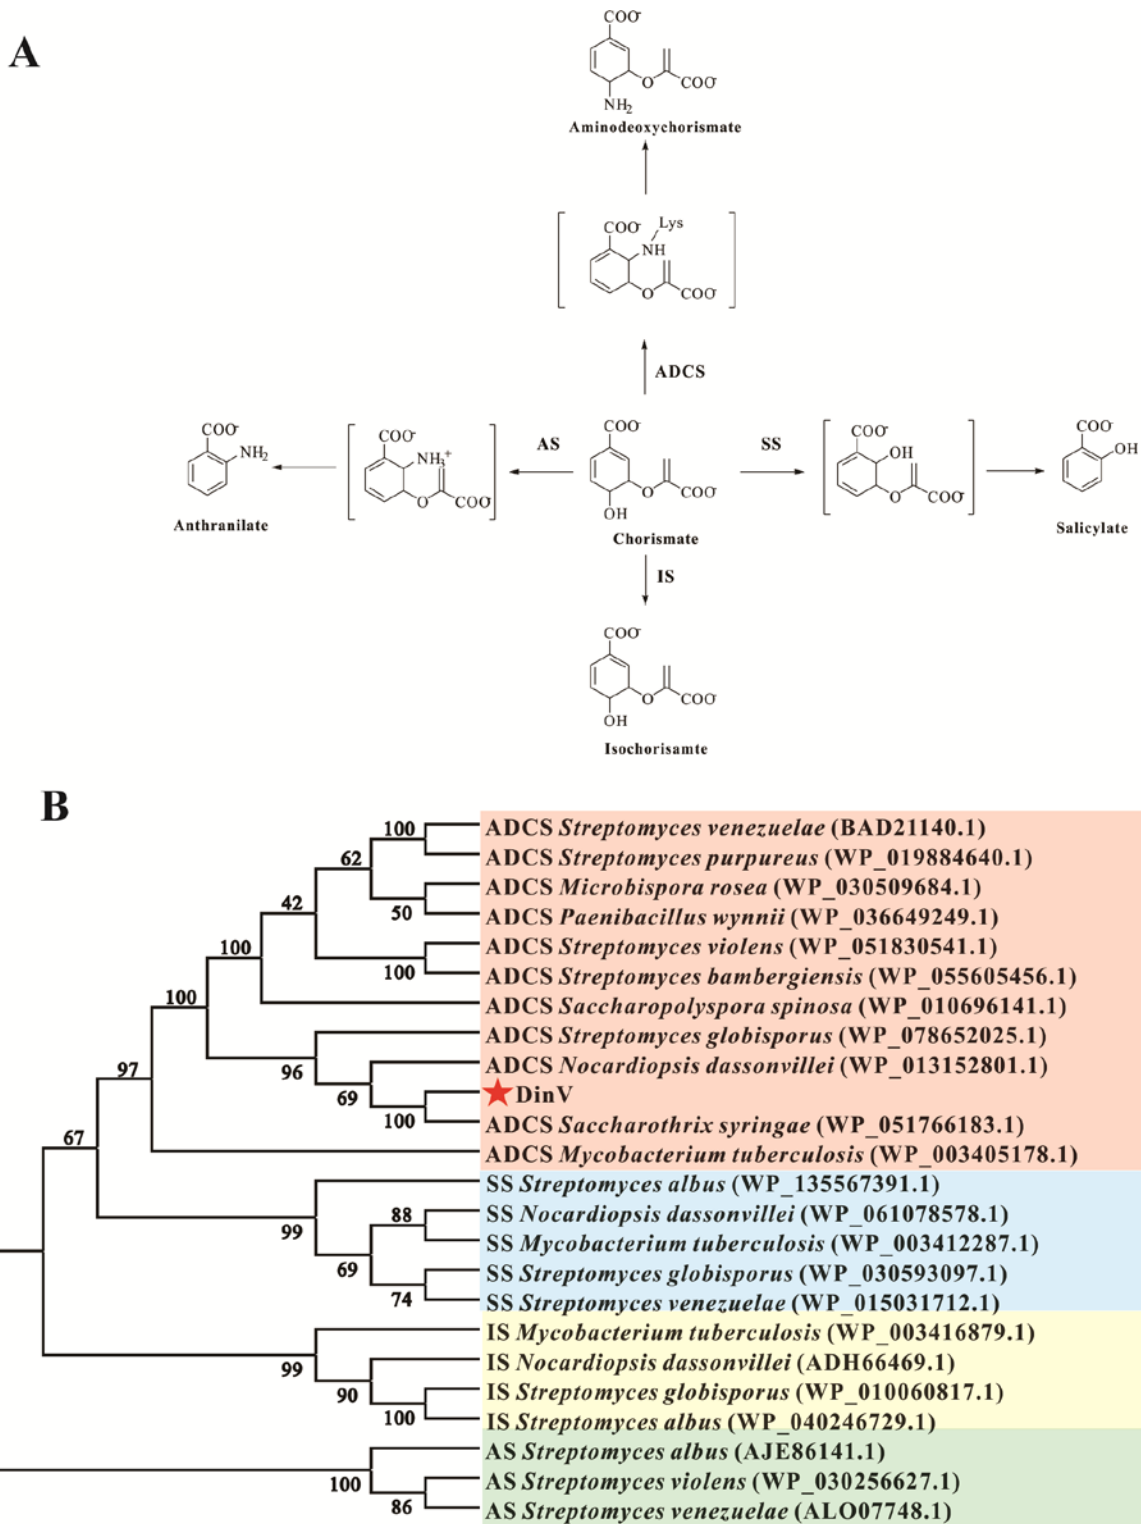

**Figure S3.** Biochemical and phylogenetic analysis of DinV. (A) Proposed function of the four homologous chorismate enzymes ADCS, IS, SS, and AS. (B) Phylogenetic tree of DinV constructed by MEGA7 using neighbor-joining method based on amino acid sequence. Numbers shown on the branch are the bootstrap values.



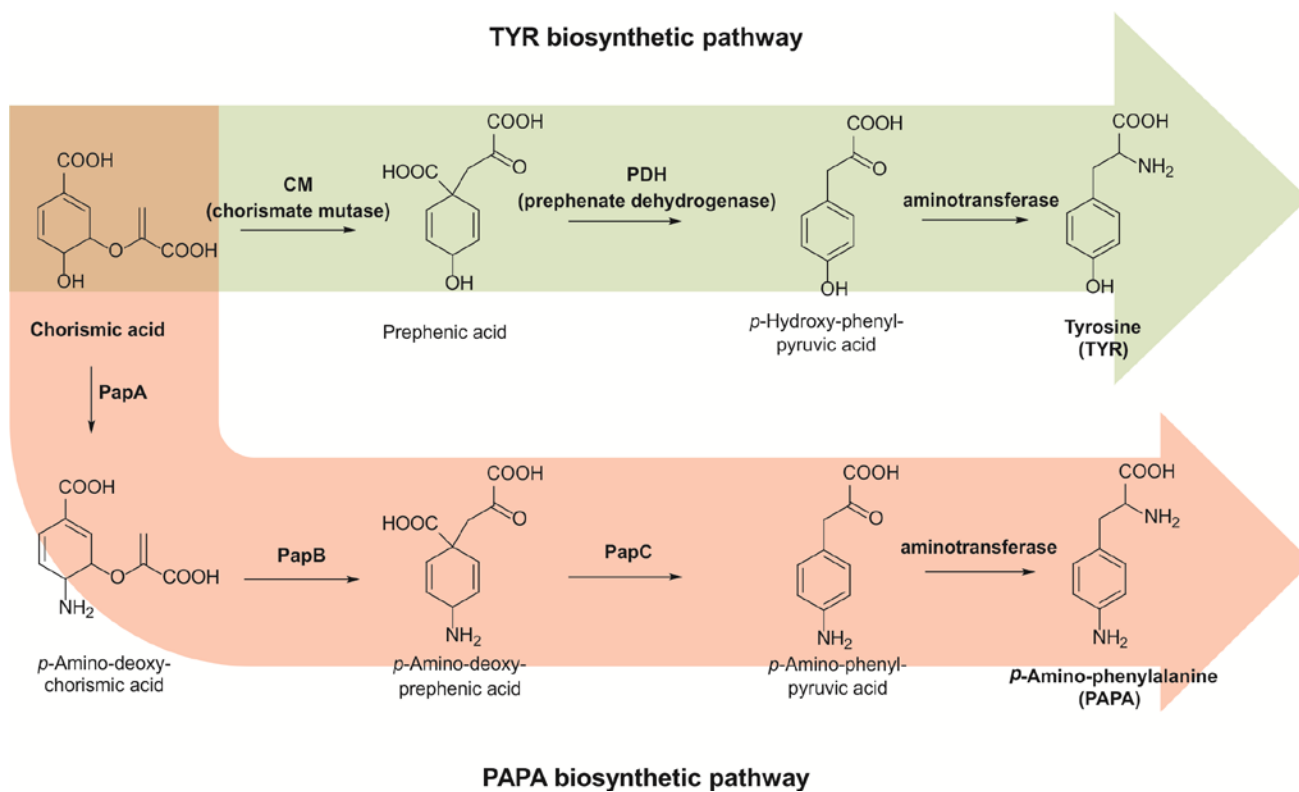

**Figure S4.** *p*-Amino-phenylalanine (PAPA) biosynthetic pathway is parallel to that of tyrosine (TYR).

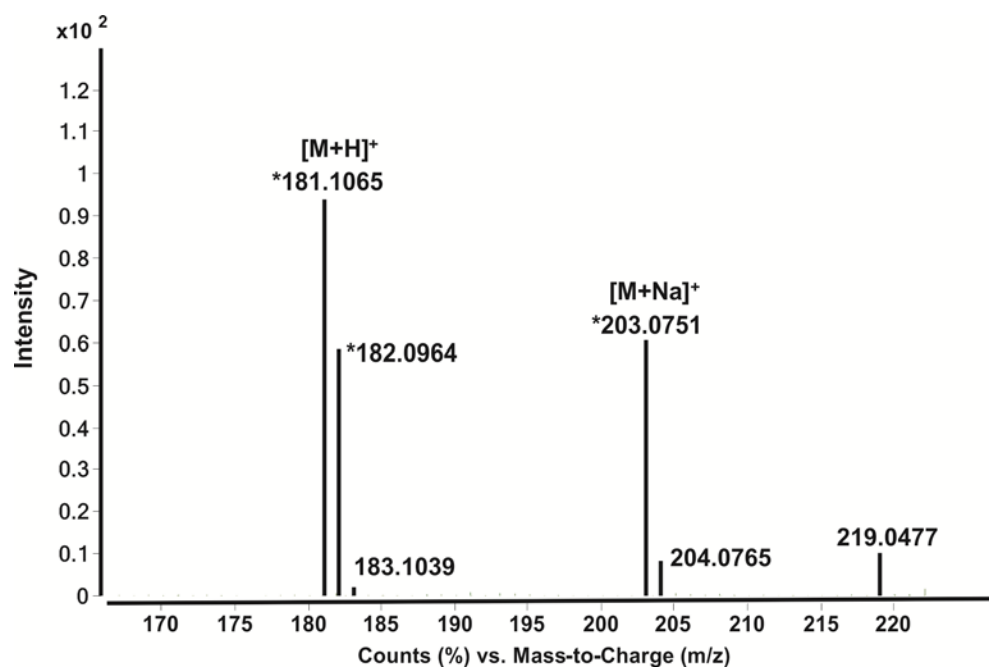

**Figure S5.** HR-ESI-MS analysis of PAPA.

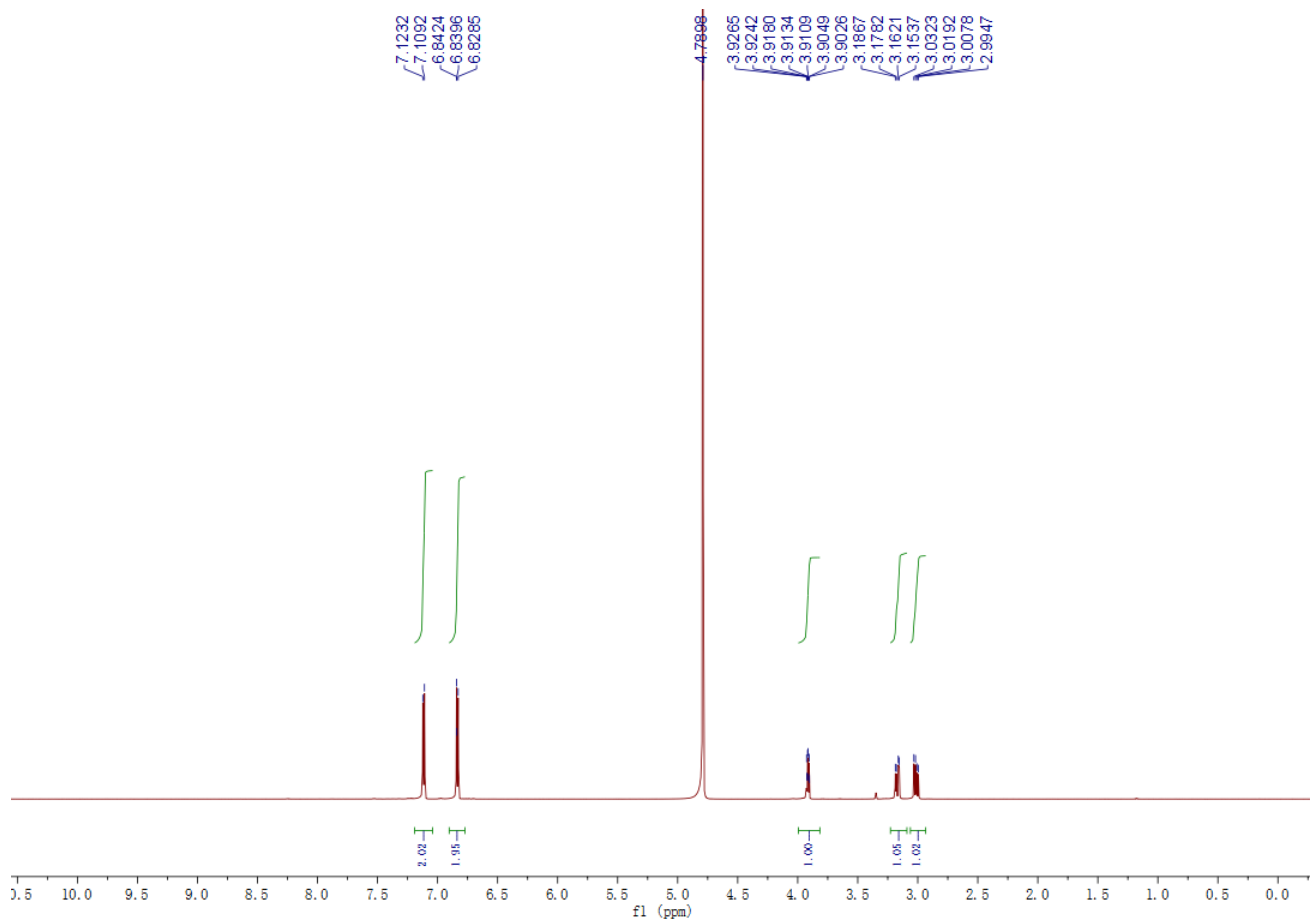

**Figure S6.** <sup>1</sup>H-NMR spectrum of PAPA in D<sub>2</sub>O (600 MHz).

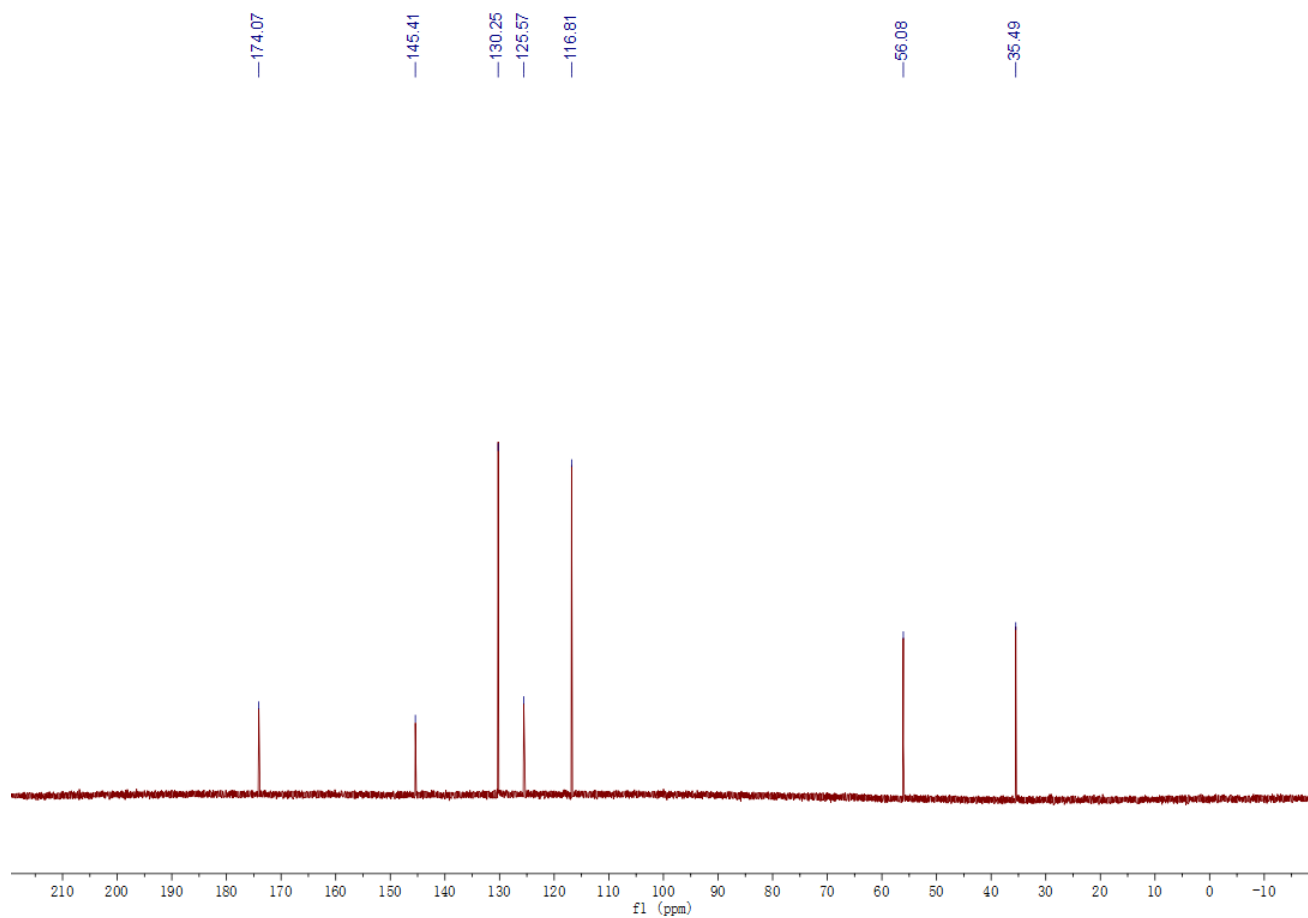

**Figure S7.**  $^{13}\text{C}$ -NMR spectrum of PAPA in  $\text{D}_2\text{O}$  (150 MHz).

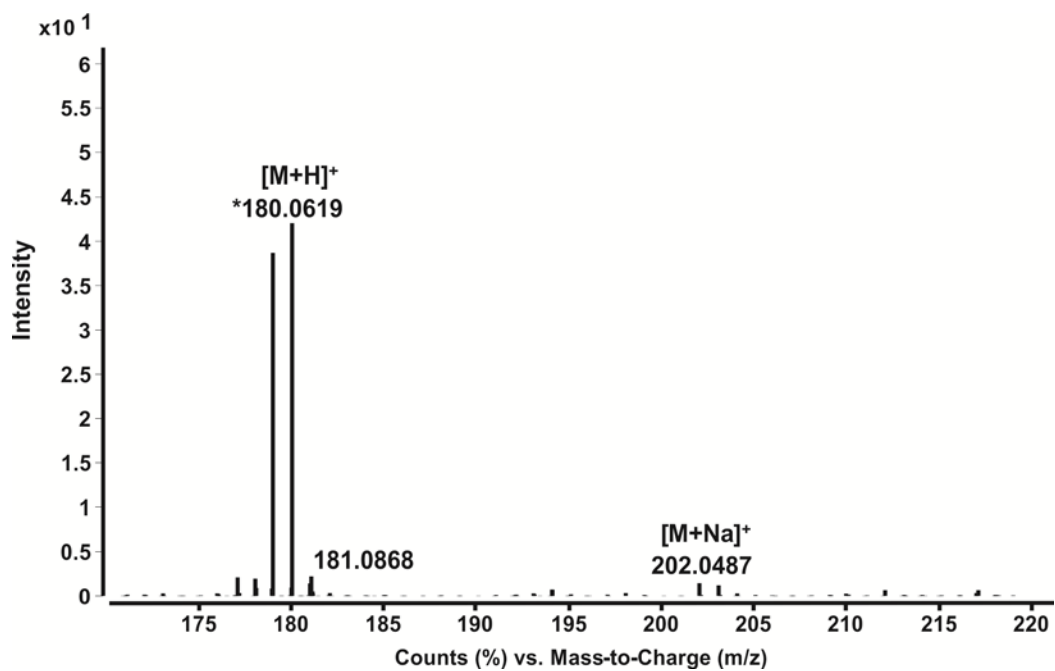

**Figure S8.** HR-ESI-MS analysis of PAPP.

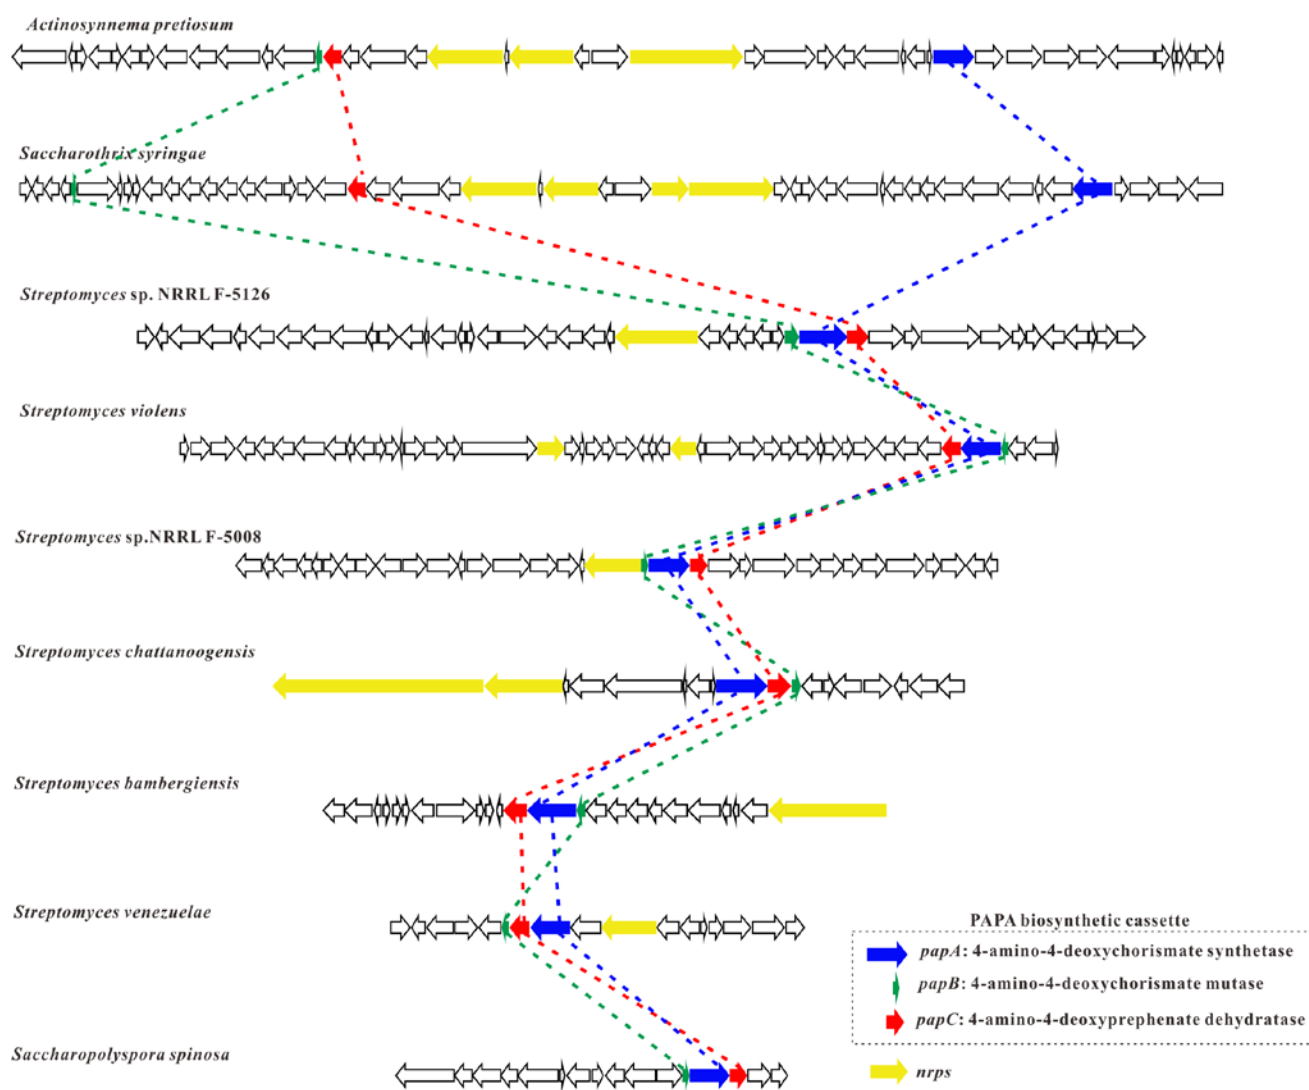

**Figure S9.** Discovery of bioactive natural products by mining PAPA biosynthetic gene cassette. The three-gene PAPA biosynthetic cassette was used to mine natural products containing PAPA building block.

Tree scale: 0.1

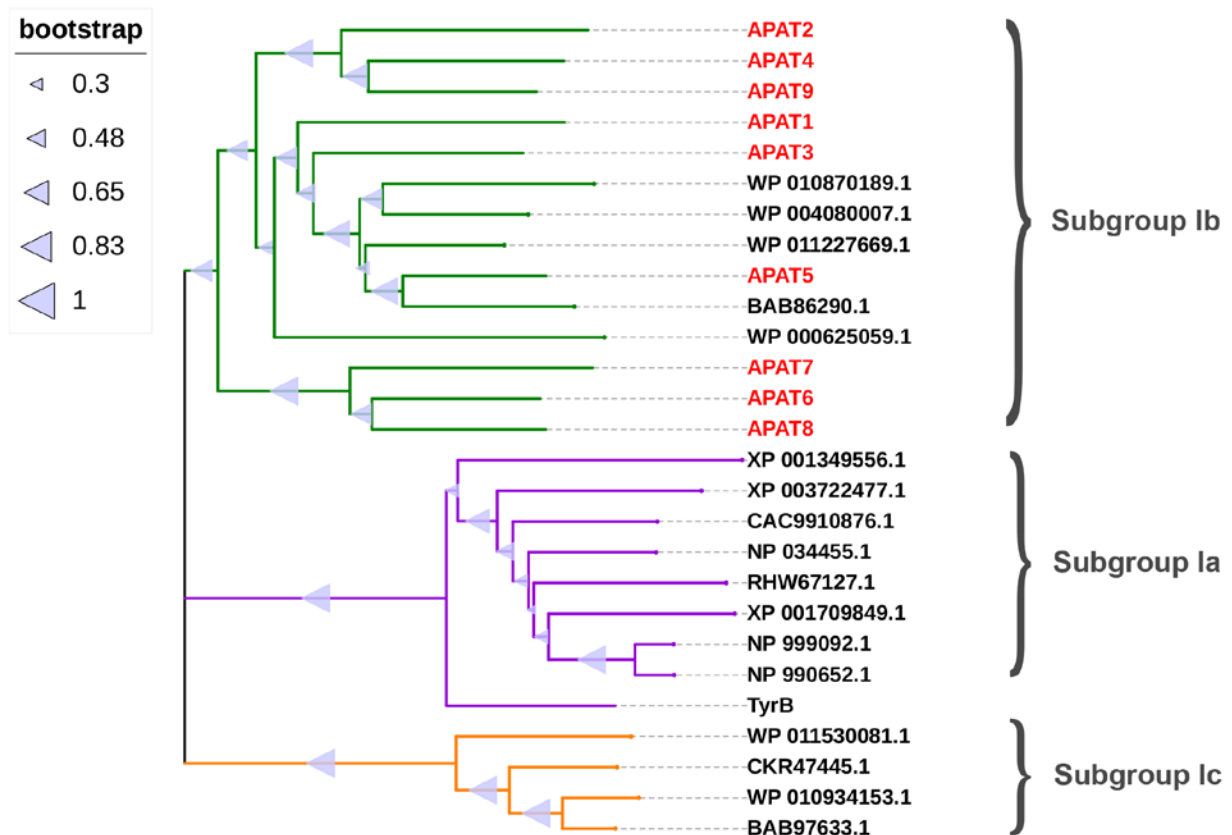

**Figure S10.** Phylogenetic analysis of APATs in strain DSM 44131<sup>T</sup>. AT enzymes from different species of subgroup Ia, Ib, and Ic were chosen for the alignment. Phylogenetic tree was constructed by MEGA7 using neighbor-joining method based on amino acid sequence. WP\_011530081.1: *Deinococcus geothermalis*; CKR47445.1: *Mycobacterium tuberculosis*; WP\_010934153.1: *Corynebacterium diphtheria*; WP\_000625059.1: *Staphylococcus aureus*; WP\_010870189.1: *Methanococcus jannaschii*; BAB86290.1: *Phormidium lapideum*; WP\_004080007.1: *Thermotoga maritima*; WP\_011227669.1: *Thermus thermophiles*; XP\_001349556.1: *Plasmodium falciparum*; XP\_003722477.1: *Leishmania major*; CAC9910876.1: *Saccharomyces cerevisiae*; XP\_001709849.1: *Giardia lamblia*; BAB97633.1: *Corynebacterium glutamicum*; NP\_999092.1: *Sus scrofa*; RHW67127.1: *Trypanosoma brucei brucei*; NP\_034455.1: *Mus musculus*; NP\_990652.1: *Gallus gallus*.

**Reference**

- He, Y., Wang, Z., Bai, L., Liang, J., Zhou, X., and Deng, Z. (2010). Two pHZ1358-derivative vectors for efficient gene knockout in streptomyces. *Journal of microbiology and biotechnology* 20(4), 678-682. doi: 10.4014/jmb.0910.10031.
- Kieser, H.M., Kieser, T., and Hopwood, D.A. (1992). A combined genetic and physical map of the *Streptomyces coelicolor* A3(2) chromosome. *Journal of bacteriology* 174(17), 5496-5507. doi: 10.1128/jb.174.17.5496-5507.1992.
- Tanida, S., Hasegawa, T., Muroi, M., and Higashide, E. (1980). Dnacins, new antibiotics. I. Producing organism, fermentation, and antimicrobial activities. *J Antibiot (Tokyo)* 33(12), 1443-1448. doi: 10.7164/antibiotics.33.1443.
